# Supplementary material
Source: PubMed Central journal article supplement (PMC5409867)
Supplement: NIHMS832330-supplement-Supp_Fig_S1.pdf [file NIHMS832330-supplement-Supp_Fig_S1.pdf]

## Supplemental Figure 1A

### AL-579 gamma4 sequence (heavy chain)

EVQLLES GGGLVQP GGSLRLSCAASGFTFSRYVMWWVRQAPGKGLEWVSYIWPSGGNT  
YYADSVKGRFTISRDN SKNTLYLQMNSLRAEDTAVYYCASSYD **Y**WSNAFD **S**WGQG **T**LVTV  
SSASTKGPSVFPLAPCSRSTSESTAALGCLVKDYFPEPVTVSWNSGALTSGVHTFPAVLQSSG  
LYSLSSVVTVPSSSLGTKTYTCNVDHKPSNTKVDKRVESKYGP **P**CPPCPAPEFLGGPSVFLFPP  
KPKDTLMISRTPEVTCVVVDVSQEDPEVQFNWYVDGVEVHNAKTKPREEQFNSTYRVVSV  
LTVLHQDWLNGKEYKCKVSNKGLPSSIEKTISKAKGQPREPQVYTLPPS QEEMTKNQVSLTC  
LVKGFYPSDIAVEWESNGQPENNYKTTTPVLDSDGSFFLYSRLTVDKSRWQEGNVFSCSVM  
HEALHNHYTQKSLSLSLGK

### 1B

### AL-579 kappa sequence (light chain)

DIQMTQSPSSLSASVGDRVTITCRASQSIGSYLNWYQQKTGKAPKALIYAASSLQSGVPSRF  
SGSGSGTDFTLTISLQLEDFATYYCQQSYSTPSFGQGTKVEIKRTVAAPSVFIFPPSDEQLKS  
GTASVVCLLNNFYPREAKVQWKVDNALQSGNSQESVTEQDSKDSTYSLSSTLTLSKADYEK  
HKVYACEVTHQGLSSPVTKSFNRGEC
